# Supplementary material for: Neonatal Orally Administered Zingerone Attenuates Alcohol-Induced Fatty Liver Disease in Experimental Rat Models
Source: MDPI journal article supplement (doi:10.3390/metabo13020167), 2023-01-23
Supplement: s1 [file s1]

## Results

Table S1. Primer sequences

| Primer Name      | Sequence 5'→3'           |
|------------------|--------------------------|
| SREBP-1C F       | CGACACCACCAGCATCAACCACG  |
| SREBP-1C R       | GCAGCCCDATTCATCAGCCAGACC |
| BETA-ACTIN F     | GCTAACAGTCCGCCTAGAAGCA   |
| BETA-ACTIN R     | GTCATCACCATCGGGCAATGAG   |
| PPAR- $\alpha$ F | GATACCACTATGGAGTCCACGCA  |
| PPAR- $\alpha$ R | GCCGAAAGAAGCCCTTG        |
| NF- $\kappa$ B F | CGTGAAGTATTCAGGTTTG      |
| NF- $\kappa$ B R | TGGGGGAAACTCATCAAAG      |
| TNF- $\alpha$ F  | GAAGTTCCCAAATGGCCTCC     |
| TNF $\alpha$ R   | GTGAGGGTCTGGGCCATAGA     |

Table S2. Effect of neonatal zingerone on ethanol consumption in alcohol-exposed rats in adult (A) male and (B) female rats

| <i>A. Males</i>                               |                         |                         |                         |                         |
|-----------------------------------------------|-------------------------|-------------------------|-------------------------|-------------------------|
| Weekly ethanol consumption (g/100g/body mass) |                         |                         |                         |                         |
| Week                                          | NM+Eth                  | NM+Eth+Eth              | NM+ZO+Eth               | NM+Eth+ZO+Eth           |
| Wk 1                                          | 3.46±0.91 <sup>a</sup>  | 2.64±0.53 <sup>a</sup>  | 2.98±0.91 <sup>a</sup>  | 2.77±0.42 <sup>a</sup>  |
| Wk 2                                          | 5.20±0.68 <sup>b</sup>  | 5.41±1.40 <sup>b</sup>  | 5.50±1.13 <sup>b</sup>  | 5.37±1.46 <sup>b</sup>  |
| Wk 3                                          | 7.40±1.64 <sup>b</sup>  | 7.16±1.42 <sup>b</sup>  | 7.59±1.89 <sup>b</sup>  | 7.64±1.77 <sup>b</sup>  |
| Wk 4                                          | 9.81±0.82 <sup>b</sup>  | 8.30±1.40 <sup>b</sup>  | 8.48±1.07 <sup>b</sup>  | 9.35±1.99 <sup>b</sup>  |
| Wk 5                                          | 9.63±0.81 <sup>b</sup>  | 8.59±2.44 <sup>b</sup>  | 8.94±1.61 <sup>b</sup>  | 8.95±1.48 <sup>b</sup>  |
| Wk 6                                          | 9.79±0.9 <sup>b</sup>   | 7.86±1.68 <sup>b</sup>  | 8.99±1.54 <sup>b</sup>  | 8.85±1.55 <sup>b</sup>  |
| Wk 7                                          | 9.39±3.47 <sup>b</sup>  | 8.09±2.37 <sup>b</sup>  | 8.86±3.30 <sup>b</sup>  | 8.55±1.85 <sup>b</sup>  |
| Wk 8                                          | 10.16±1.18 <sup>b</sup> | 8.68±1.38 <sup>b</sup>  | 9.26±1.49 <sup>b</sup>  | 9.25±1.32 <sup>b</sup>  |
| Mean                                          | 8.10±2.52               | 7.02±2.09               | 7.57±2.22               | 7.59±2.34 <sup>b</sup>  |
| <i>A. Females</i>                             |                         |                         |                         |                         |
| Weekly ethanol consumption (g/100g/body mass) |                         |                         |                         |                         |
| Week                                          | NM+Eth                  | NM+Eth+Eth              | NM+ZO+Eth               | NM+Eth+ZO+Eth           |
| Wk 1                                          | 3.79±0.94 <sup>a</sup>  | 4.15±1.01 <sup>a</sup>  | 4.61±0.57 <sup>a</sup>  | 4.50±1.26 <sup>a</sup>  |
| Wk 2                                          | 6.68±1.32 <sup>b</sup>  | 8.06±2.47 <sup>b</sup>  | 7.52±2.78 <sup>b</sup>  | 7.64±1.82 <sup>b</sup>  |
| Wk 3                                          | 9.89±1.49 <sup>b</sup>  | 12.53±8.81 <sup>b</sup> | 10.62±3.24 <sup>b</sup> | 9.76±1.60 <sup>b</sup>  |
| Wk 4                                          | 11.16±2.82 <sup>b</sup> | 13.43±5.53 <sup>b</sup> | 10.05±1.60 <sup>b</sup> | 10.90±1.96 <sup>b</sup> |
| Wk 5                                          | 11.99±6.65 <sup>b</sup> | 10.72±1.51 <sup>b</sup> | 12.11±2.7 <sup>b</sup>  | 11.42±3.88 <sup>b</sup> |
| Wk 6                                          | 10.81±2.70 <sup>b</sup> | 10.37±0.90 <sup>b</sup> | 10.23±2.54 <sup>b</sup> | 10.51±1.14 <sup>b</sup> |
| Wk 7                                          | 10.58±2.77 <sup>b</sup> | 9.21±1.95 <sup>b</sup>  | 11.46±4.18 <sup>b</sup> | 10.04±2.07 <sup>b</sup> |
| Wk 8                                          | 11.72±1.74 <sup>b</sup> | 12.49±1.81 <sup>b</sup> | 12.31±1.55 <sup>b</sup> | 11.97±1.93 <sup>b</sup> |
| Mean                                          | 9.58±2.87               | 10.12±3.01              | 9.86±2.61               | 9.59±2.44               |

Data is presented as mean  $\pm$  standard deviation. <sup>ab</sup> = preceding week's ethanol intake was significantly lower at  $p < 0.05$ . **NM + W** = gavaged with 10 ml/kg body mass per day nutritive milk during suckling + plain drinking water in adulthood; **NM+Eth+ W** = gavaged with 10 ml/kg body mass per day nutritive milk and Eth during suckling + plain drinking water in adulthood; **NM+Eth** = gavaged with 10 ml/kg body mass per day nutritive milk during suckling + Eth solution in adulthood; **NM + Eth+ Eth** = gavaged with 10 ml/kg body mass per day nutritive milk and Eth during suckling + Eth solution in adulthood; **NM+ ZO + W** = gavaged with 10 ml/kg body mass per day nutritive milk and ZO during suckling + plain drinking water in adulthood; **NM+Eth+ZO+W** = gavaged with 10 ml/kg body mass per day nutritive milk, Eth and ZO during suckling + plain drinking water in adulthood; **NM+ZO+Eth** = gavage with 10 ml/kg body mass per day nutritive milk and ZO during suckling + Eth solution in adulthood; **NM+Eth+ZO+ Eth** = gavage with 10 ml/kg body mass per day nutritive milk, Eth and ZO during suckling + Eth solution in adulthood n = 6-8 per treatment group
